# Supplementary material
Source: publisher site journal article supplement (https://www.dovepress.com/article/403190)
Supplement: Supplementary file 1 [file get_supplementary_file.php]

# Supporting Information

1

2

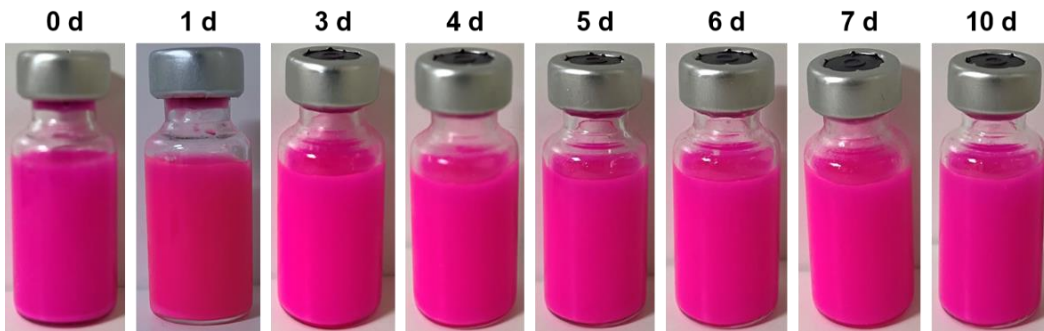

3

4 **Figure S1.** The digital photograph of AH111972-PFCE NPs within 10 days.

5

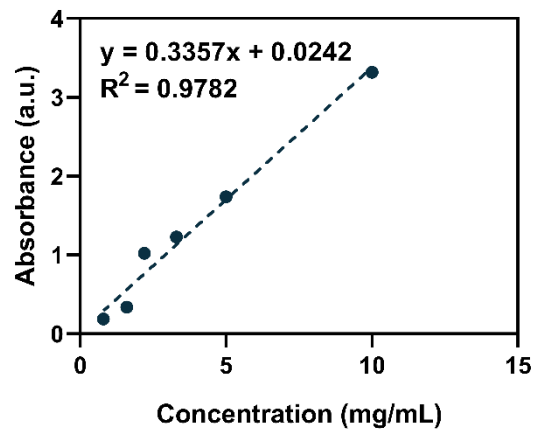

6

7 **Figure S2.** Standard curve of AH111972 content by using ultraviolet and visible spectrophotometry.

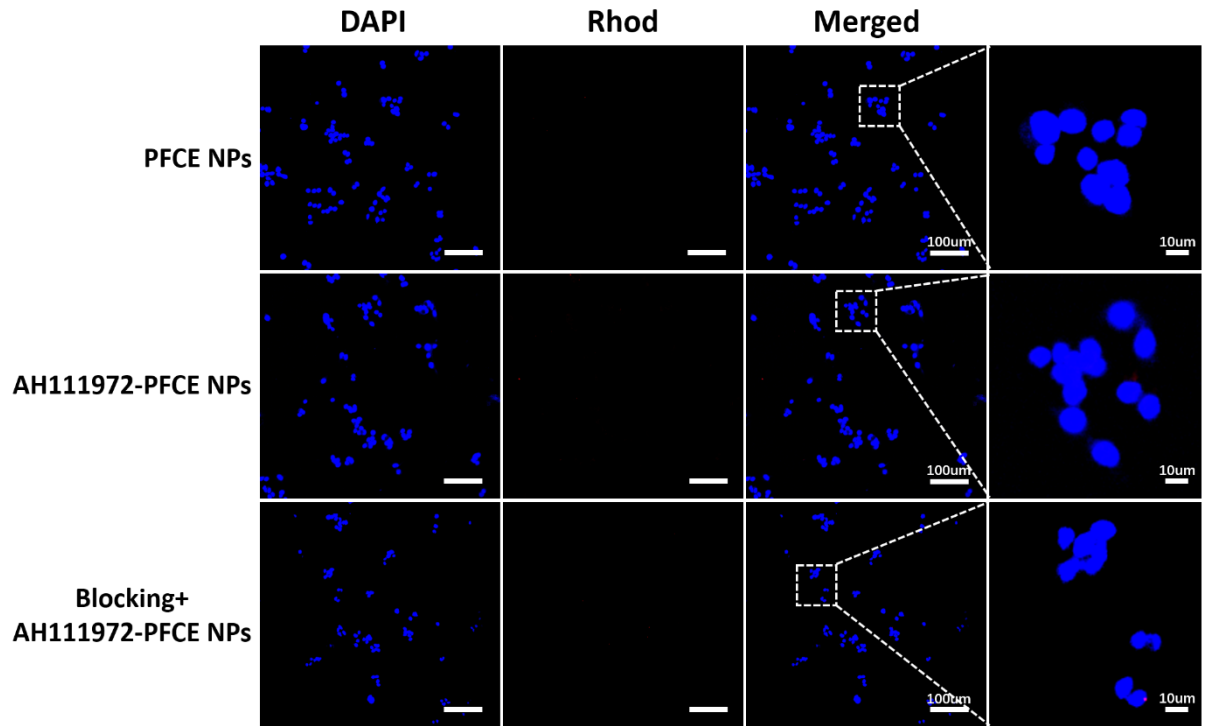

8

9 **Figure S3.** CLSM images of Lovo cells in PFCE NPs, AH111972-PFCE NPs and blocking groups. Blue

10 fluorescence indicates nuclei stained with DAPI; red fluorescence represents rhodamine-labeled PFCE

11 NPs or AH111972-PFCE NPs. Scale bar is 100 µm.

12

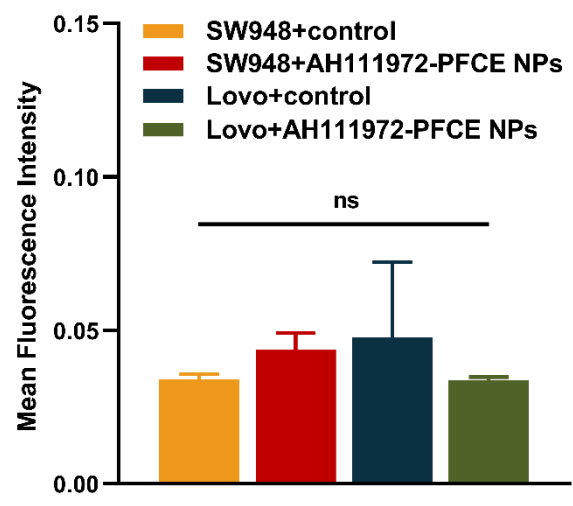

13

14 **Figure S4.** Quantitative analysis of apoptosis in SW948 and Lovo cells determined by TUNEL staining

15 after incubation with AH111972-PFCE NPs for 24 h.

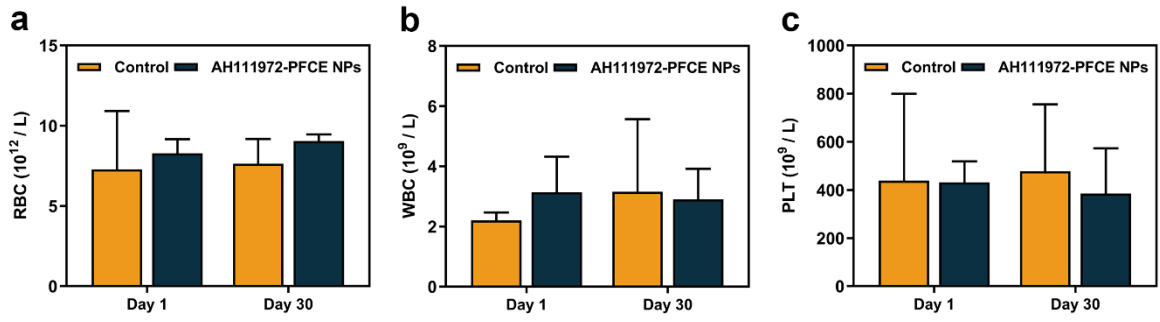

16

17 **Figure S5.** Routine blood biochemical data of mice intravenously injected with AH111972-PECF NPs.(a)

18 red blood cell count (RBC), (b) white blood cell count (WBC), (c) platelet count (PLT).
